# Supplementary material for: International comparisons of the consultation prevalence of musculoskeletal conditions using population-based healthcare data from England and Sweden
Source: PubMed Central journal article supplement — Ann Rheum Dis. 2013 Jan 23;73(1):212–8. doi: 10.1136/annrheumdis-2012-202634 (PMC3888586; doi:10.1136/annrheumdis-2012-202634), 2013-01-23
Supplement: annrheumdis-2012-202634-s1.pdf [file annrheumdis-2012-202634-s1.pdf]

**Table S1: Morbidity definitions**

| Morbidity                 | Definition                                                                                                                                                                                                                                           |
|---------------------------|------------------------------------------------------------------------------------------------------------------------------------------------------------------------------------------------------------------------------------------------------|
| Musculoskeletal disorders | Any morbidity within the Musculoskeletal and connective tissue diseases chapters of Read Code (Chapter N - for UK) or ICD-10 (Chapter M – for Sweden) systems                                                                                        |
| Osteoarthritis            | Osteoarthritis and Allied Disorders excluding axial osteoarthritis                                                                                                                                                                                   |
| Joint pain                | Codes synonymous with osteoarthritis in older adults (knee, hand, hip, foot/ankle pain)                                                                                                                                                              |
| Low back pain             | Non-specific low back pain<br><br>Including: Low back pain, Loin pain, Low back strain, Lumbago, Lumbago with sciatica, Dorsalgia unspecified, Backache<br><br>Excluding: Known cause e.g. Intervertebral disc disorder, Infection, Lordosis, Injury |
| Rheumatoid arthritis      | Rheumatoid arthritis<br><br>Excluding: Juvenile rheumatoid arthritis, Rheumatic fever, Seronegative arthritis, Inflammatory polyarthropathy                                                                                                          |
| Spondyloarthritis         | Inflammatory spondylopathies<br><br>Including: Ankylosing spondylitis, Psoriatic arthritis, Arthropathy in ulcerative colitis, Arthropathy in Crohn's disease                                                                                        |
| Ankylosing spondylitis    | Ankylosing spondylitis<br><br>Excluding: Juvenile ankylosing spondylitis                                                                                                                                                                             |
| Psoriatic arthritis       | Psoriatic arthritis                                                                                                                                                                                                                                  |
